# Supplementary material for: α-synuclein overexpression in the retina leads to vision impairment and degeneration of dopaminergic amacrine cells
Source: PubMed Central journal article supplement (PMC7295803; doi:10.1038/s41598-020-66497-6), 2020-06-15
Supplement: 41598_2020_66497_MOESM1_ESM.pdf [file 41598_2020_66497_MOESM1_ESM.pdf]

## **$\alpha$ -synuclein overexpression in the retina leads to vision impairment and degeneration of dopaminergic amacrine cells**

Marrocco Elena\*, Alessia Indrieri\*, Esposito Federica\*, Tarallo Valeria, Carboncino Anna, Alvino Filomena Grazia, De Falco Sandro, Franco Brunella, De Risi Maria, De Leonibus Elvira<sup>#</sup>.

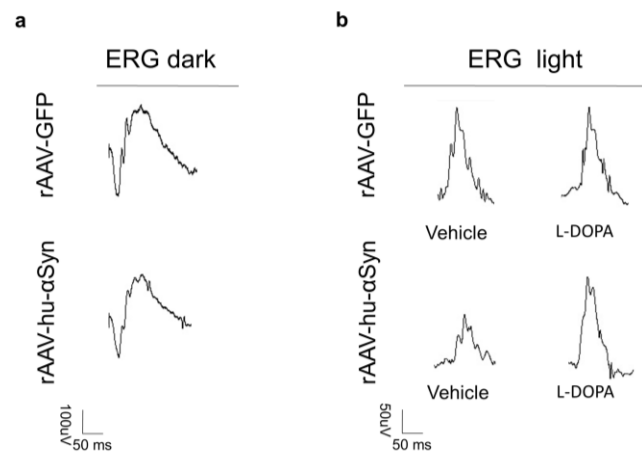

**Supplementary Figure 1, related to Figure 1.** (a) Representative ERG traces (in dark conditions) showing the maximum amplitude obtained with flashes of 10 cd.s/m<sup>2</sup> in animals treated with rAAV2/6-hu- $\alpha$ -syn and rAAV2/6-GFP (control). (b) Representative ERG traces (light conditions) in animals treated with rAAV2/6-hu- $\alpha$ -syn and rAAV2/6-GFP (control) after treatment with vehicle or L-DOPA. The waves refer to retinal responses after 8 min of light adaptation (last point Figure 1e).

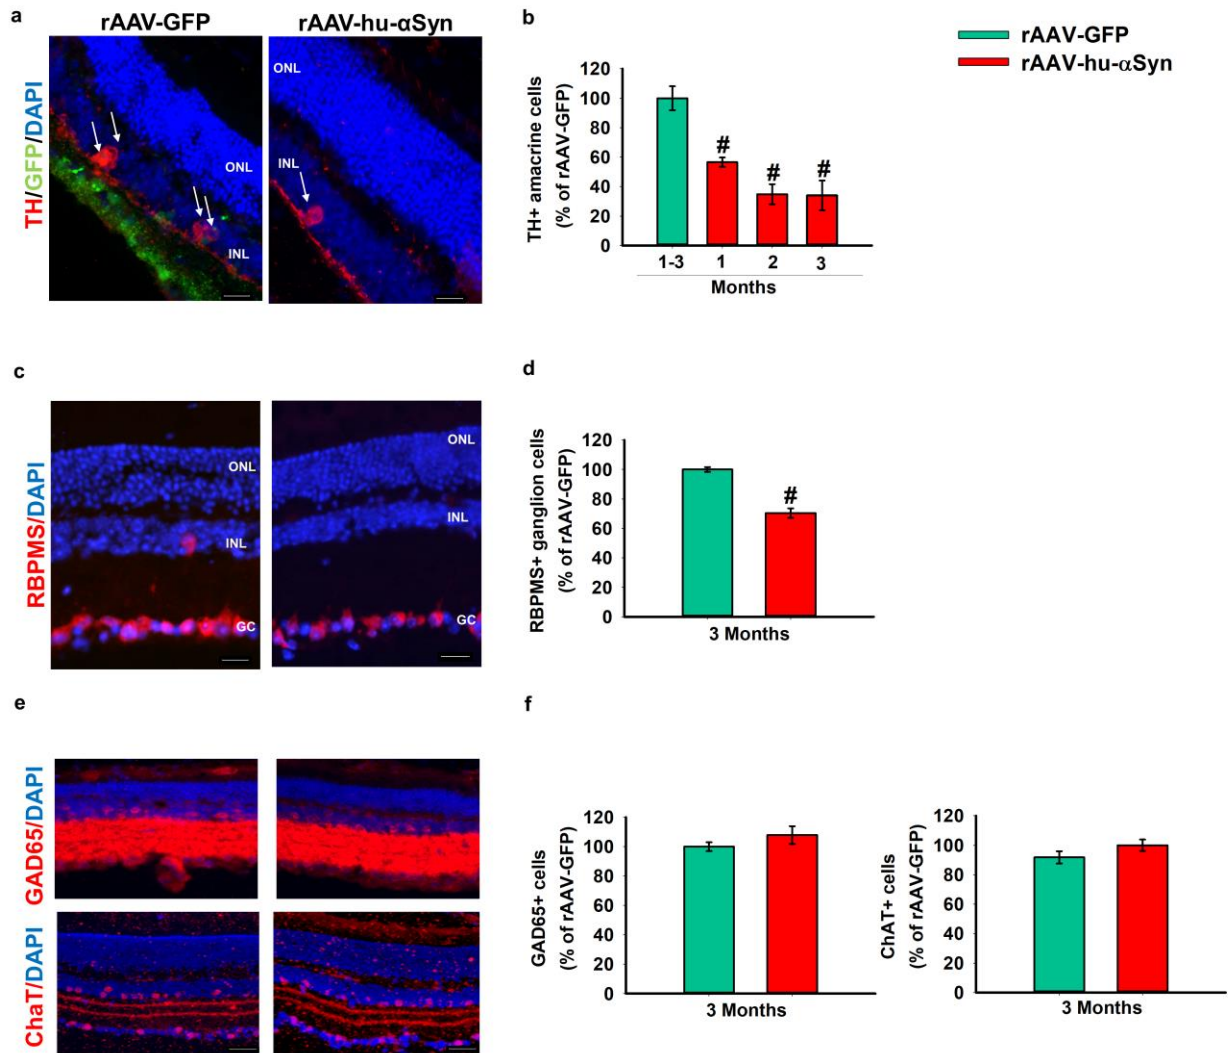

**Supplementary Figure 2, related to Figure 4. Dopaminergic amacrine cells, but not GABAergic or cholinergic, are lost in  $\alpha$ -syn injected retina. (a-b)** Representative immunofluorescence on vertical retinal sections of rAAV-hu- $\alpha$ -syn injected mice (left) and rAAV-GFP mice (right) stained with antibody anti-tyrosine hydroxylase (TH) (red). White arrows indicate TH+ amacrine cells 1 month post-injection (10x Magnification, Scale bar 50 $\mu$ m), [one-way ANOVA group  $F_{(1,3)}=1161.600$ ;  $p<0.0001$ ]. **(c-d)** RBPMS staining (red) performed at 3 months post injection in rAAV-hu- $\alpha$ -syn injected mice and rAAV-GFP mice (right) (20x

Magnification, Scale bar 50 $\mu$ m) [one-way ANOVA, group  $F_{(1,27)}=5.204$ ;  $p=0.0306$ ]. **(e-f)** GAD65 and ChAT staining on retina of rAAV-hu- $\alpha$ -syn and rAAV-GFP- injected at 3 month post injection (20x Magnification, Scale bar 50 $\mu$ m) [GAD65: one-way ANOVA, group  $F_{(1,41)}=0.733$ ;  $p=0.3970$ ; ChAT+: one-way ANOVA, group  $F_{(1,28)}=2.128$ ;  $p=0.155$ ]. Data represent mean  $\pm$  SEM. #  $p < 0.05$  vs rAAV-GFP.

**Supplementary Videos.** Videos showing visual task performance of C57BL/6J mice pre-injection (Video 1), after intravitreal injection of (rAAV-hu- $\alpha$ -syn) combined with saline (Video 2) and L-DOPA replacement therapy (Video 3). **(Video 1)** Representative sample trial of a C57BL/6J mouse during the visual task where it is required to discriminate between a 3 cm black and white striped card and a 4 cm black and white striped card. The platform is located under the 3 cm striped card. **(Video 2)** Representative trial of the visual task showing that bilateral rAAV-hu- $\alpha$ -syn intravitreal injection affects performance at the first stage of the procedure when animals are required to discriminate between a 1 cm black and white striped card and a 10 cm black and white striped card. The platform is located under the 1 cm striped card. **(Video 3)** Representative trial of the visual task showing that L-DOPA treatment rescues performance in rAAV-hu- $\alpha$ -syn injected mice on the same trial reported in Video 2.
